# Supplementary material for: Cu-mediated broadening of the absorption band of quaternary Cu–Ag–In–S/CdSe type-II core/shell quantum dot-sensitized solar cells with an efficiency of 12.51% under 0.25 sun
Source: Royal Society of Chemistry journal article supplement (doi:10.1039/d4se00252k), 2024-01-01
Supplement: d4se00252k1.pdf [file d4se00252k1.pdf]

## Supplementary Information

# **Cu-Mediated Broadening of the Absorption Band of Quaternary Cu-Ag-In-S/CdSe Type-II Core/Shell Quantum Dot-Sensitized Solar Cells with an Efficiency of 12.51% Under 0.25 Sun**

Siti Utari Rahayu<sup>1,2</sup>, Andy Candra<sup>3</sup>, Jen-Bin Shi<sup>4</sup> and Ming-Way Lee<sup>1\*</sup>

*<sup>1</sup>Department of Physics and Institute of Nanoscience, National Chung Hsing University, Taichung, 402, Taiwan*

*<sup>2</sup>Department of Physics, Faculty of Mathematics and Natural Sciences, Universitas Sumatera Utara, Medan 20155, Sumatera Utara, Indonesia*

*<sup>3</sup>Department of Chemistry, Faculty of Mathematics and Natural Sciences, Universitas Sumatera Utara, Medan 20155, Sumatera Utara, Indonesia*

*<sup>4</sup>Department of Electronic Engineering, Feng Chia University, Taichung, 40724, Taiwan*

*\*Corresponding Author: [mwl@phys.nchu.edu.tw](mailto:mwl@phys.nchu.edu.tw)*

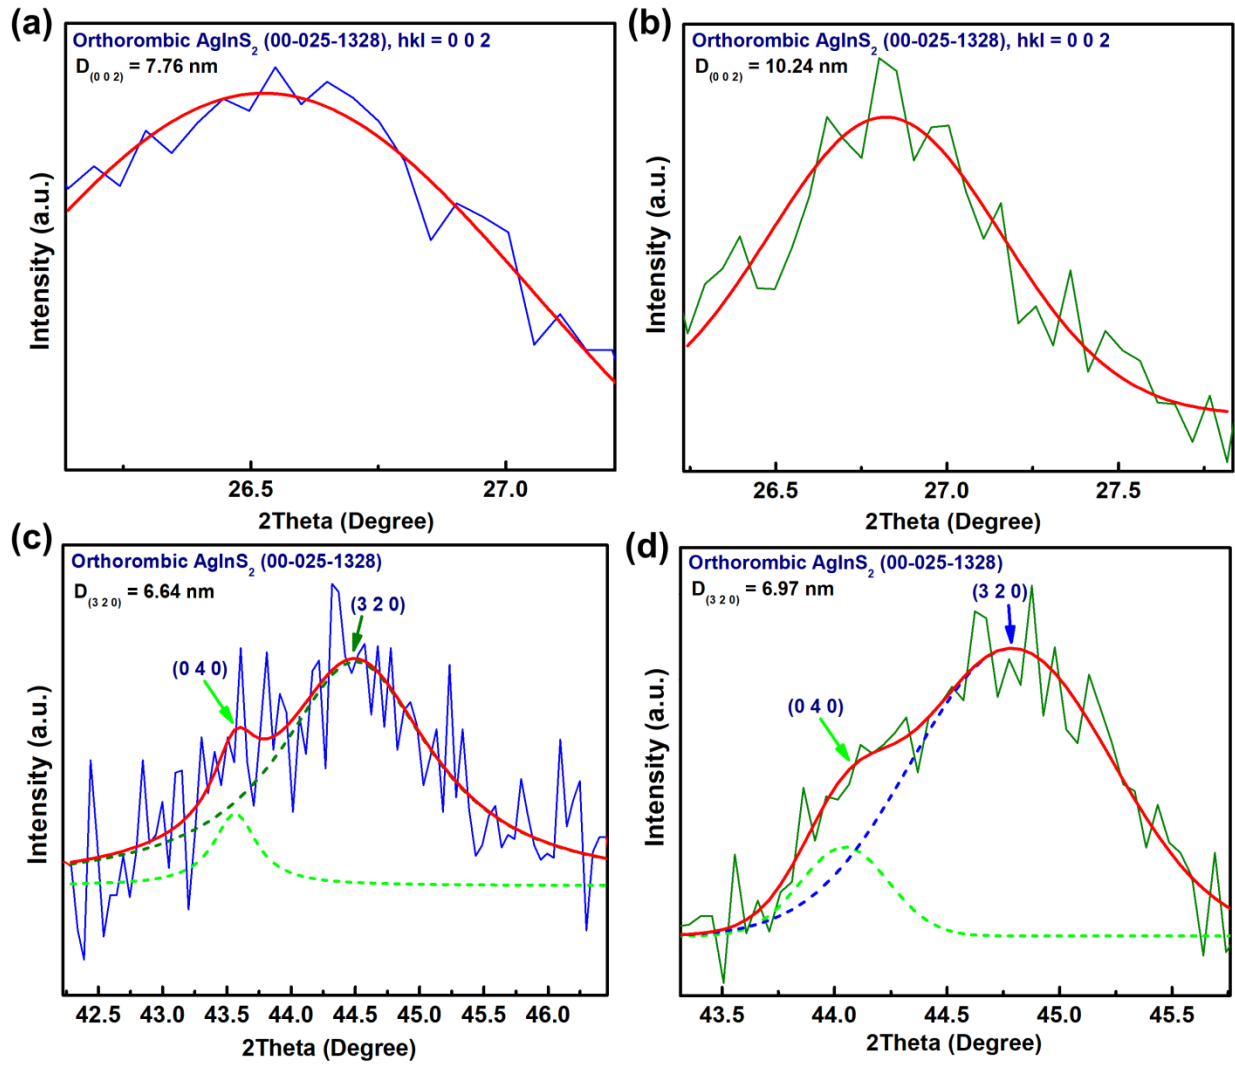

**Fig. S1** Gaussian curve fit of (a)  $\text{AgInS}_2$  QDs (0 0 2), (b) Cu-Ag-In-S QDs (0 0 2), Gaussian multi peaks curve fit of (c)  $\text{AgInS}_2$  QDs (0 4 0 and 3 2 0), (d) Cu-Ag-In-S QDs (0 4 0 and 3 2 0)

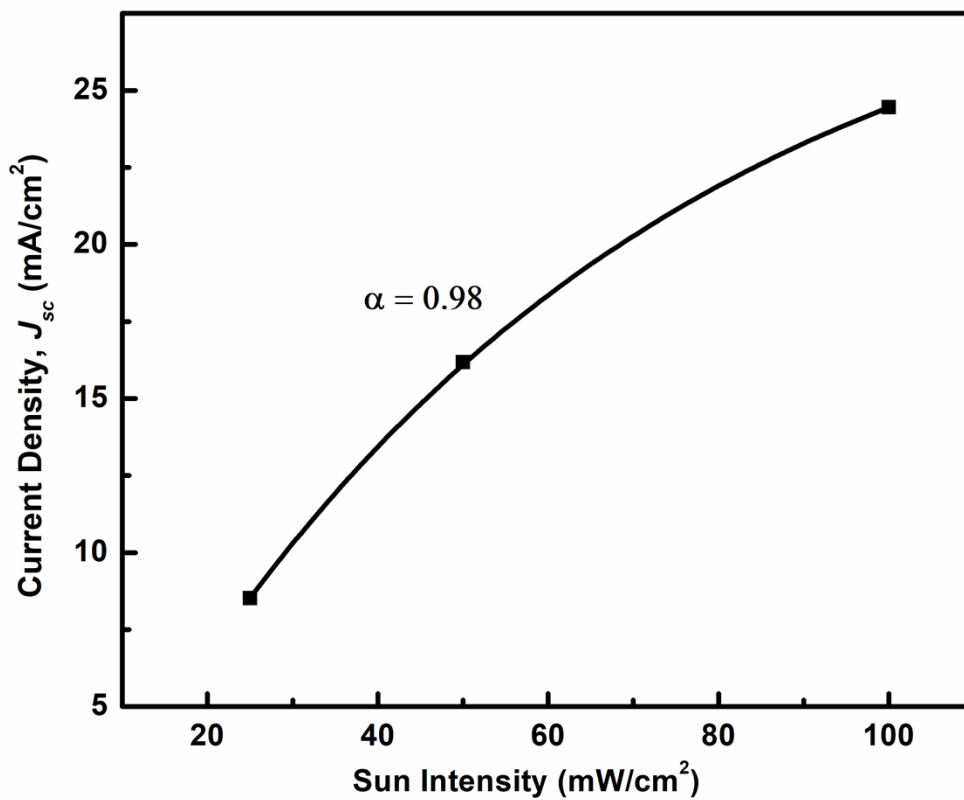

**Fig. S2** Sun intensity dependence of the current density,  $J_{sc}$ . The data are fitted with the power law equation to determine the degree of linearity of the photocurrent with the sun intensity.
